# Supplementary material
Source: HighWire-hosted journal article supplement (https://n.neurology.org/content/suppl/2010/09/07/74.13.1069)
Supplement: tomsick.pdf [file tomsick.pdf]

## 脑血管再通治疗策略的权衡

## Equipose among recanalization strategies

T.A. Tomsick, MD  
 P. Khatri, MD  
 T. Jovin, MD  
 B. Demaerschalk, MD  
 T. Malisch, MD  
 A. Demchuk, MD  
 M.D. Hill, MD  
 E. Jauch, MD  
 J. Spilker, RN  
 J.P. Broderick, MD  
 For the IMS III  
 Executive Committee

## 摘要

现代急性脑血管病的治疗是建立在脑组织保护和预后良好的关键在于血管再通和随后再灌注这个假设上。本文比较了急性脑卒中的静脉重组组织型纤溶酶原激活物(静脉rt-PA)治疗和动脉再灌注治疗的临床疗效。过去观点认为,静脉应用rt-PA治疗大动脉闭塞的再通率低于动脉治疗方法,但最近利用经颅多普勒和核磁共振血管成像研究发现静脉应用rt-PA治疗方法具有更高的再通率;相反,许多报道动脉治疗具有更高的再通率,但重新再灌注时间非常重要,程序上的延迟和治疗中的各种危险因素会阻碍该方法进行。与静脉治疗相比,经动脉的斑块清除术具有更高的动脉再通率,但并不能改善患者的预后。而动静联合治疗可以发挥两者的优点,但必须具有最佳治疗时间。需权衡各种治疗策略,在这种情况下,可将患者随机分组进入静脉应用rt-PA治疗或经静脉治疗后进行经动脉干预,同时将新的干预措施纳入试验,这才是合理恰当的研究方法。

NEUROLOGY 2010;74:1069-1076 刘佳译;周涌涛校

Address correspondence and reprint requests to Dr. Joseph P. Broderick, Department of Neurology, UC Neuroscience Institute, University of Cincinnati Academic Health Center, 260 Stetson St, Suite 2300, PO Box 670525, Cincinnati, OH 45267-0525  
 joseph.broderick@uc.edu

急性脑血管病的最佳治疗目前尚不确定,需要权衡两种或两种以上存在竞争的治疗手段,目前如何确定特定患者的最佳治疗缺少依据,在急性缺血性脑卒中最佳再灌注治疗仍在研究中。仍需权衡在评估某位患者时在大规模社区或社区中的进行治疗的研究者和医生,以及每个医生或研究者评估的水平。本文通过比较在急性缺血性脑卒中静脉应用rt-PA和再灌注动脉治疗两种方法的临床效果,探讨问题的关键所在。

现代急性脑血管病的治疗是建立在脑组织保护和预后良好的关键在于血管再通和随后再灌注这个假设上。此假设并非绝对正确,少数软脑膜侧枝循环代偿很好的患者即使没有再通,损伤很小,临床恢复也比较好,不过大部分脑缺血患者只有通过再通和再灌注才能预后较好。重要的是与冠状动脉无再流现象类似,再通后(动脉闭塞的部位血流恢复)血管造影显示终末血管或是相应支配组织再灌注不充足。在一些临床试验和病例中缺少如何界定再通和再灌注,尤其没有中心专家利用已经确定的方法阅读血管成像。此外,虽然进行再通和再灌注,脑组织也可能因为缺血的时间和严重程度已经造成了不可逆的损伤。卒中后的再灌注可能是有害,因为在再灌注比例损伤和再灌注性出血下会产生一系列有害生化过程,药物、造影剂、再通和再灌注也造成损害,因此,较高的再通和再灌注并不能证明具有好的临床疗效。

为了阐明这个问题,本文回顾了关于再通和再灌注比例、动脉治疗风险、静脉治疗风险、半影影像学在患者选择中的作用,以及基于这些数据得出的结论。

## 再通比例

在所有血管造影评估再通,应用动脉治疗的前驱剂量递增试验中,小剂量静脉rt-PA用于许多患者,Mori等<sup>[1]</sup>报道,发生在6小时以内的卒中,使用40~60mg度替普酶(一种双链rt-PA)1小时后,在19例前循环闭塞患者中再通比例约为47%。t-PA急性卒中研究机构评估了有脑血管造影患者,并对8小时急性卒中患者使用多种剂量的度替普酶(不使用快速灌

From the University of Cincinnati (T.A.T., P.K., J.S., J.P.B.); University of Pittsburgh (T.J.); Mayo Clinic Arizona (B.D.); Alexian Brothers Medical Center (T.M.); University of Calgary (A.D., M.D.H.); Medical University of South Carolina (E.J.).

Study funding: IMS III is funded by NINDS (U01 NS052220 and U01 NS054630). The trial receives rt-PA from Genentech, and devices from Concentric, EKOS, Penumbra, and Johnson & Johnson.

Disclosure: Author disclosures are provided at the end of the article.
